# Supplementary material for: Corrosion-assisted in situ growth of NiCoFe-layered double hydroxides on Fe foam for sensitive non-enzymatic glucose detection
Source: Royal Society of Chemistry journal article supplement (doi:10.1039/d3dt02622a), 2023-01-01
Supplement: d3dt02622a1.pdf [file d3dt02622a1.pdf]

## Electronic Supplementary Information

### Corrosion assisted In-Situ Growth of NiCoFe-Layered Double Hydroxides on Fe Foam for Sensitive Non-Enzymatic Glucose Detection

Yi Dong, Yuchi Zhang, Yan Xu\*

*Department of Chemistry, College of Sciences, Northeastern University, Shenyang, Liaoning 110819, China*

#### Calculation of low detection limit (LOD).

The LOD value was calculated by the equation:  $LOD = 3S_b/K$  ( $S/N = 3$ ),<sup>1</sup> where  $S_b$  is the relative standard deviation (RSD) of 10 blank samples, and  $K$  is the slope of the calibration curve of NiCoFe LDH/FF composite for the current response of glucose in the range of 0.01 to 1.0 mM.

#### Figures

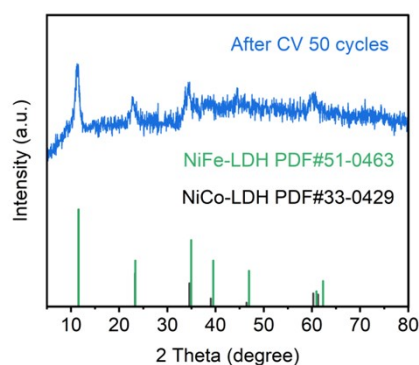

Fig. S1 Chemical stability of NiCoFe LDH after CV 50 cycles in 0.1 M NaOH with adding 3 mM glucose.

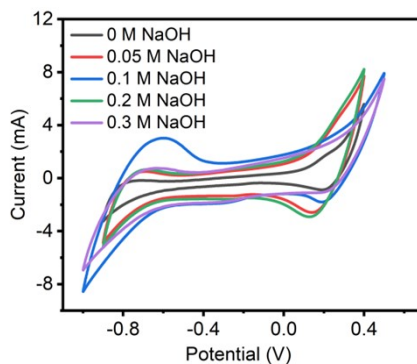

Fig. S2 CV curves of NiCoFe LDH/FF recorded in NaOH solution of various concentrations containing 3 mM glucose.

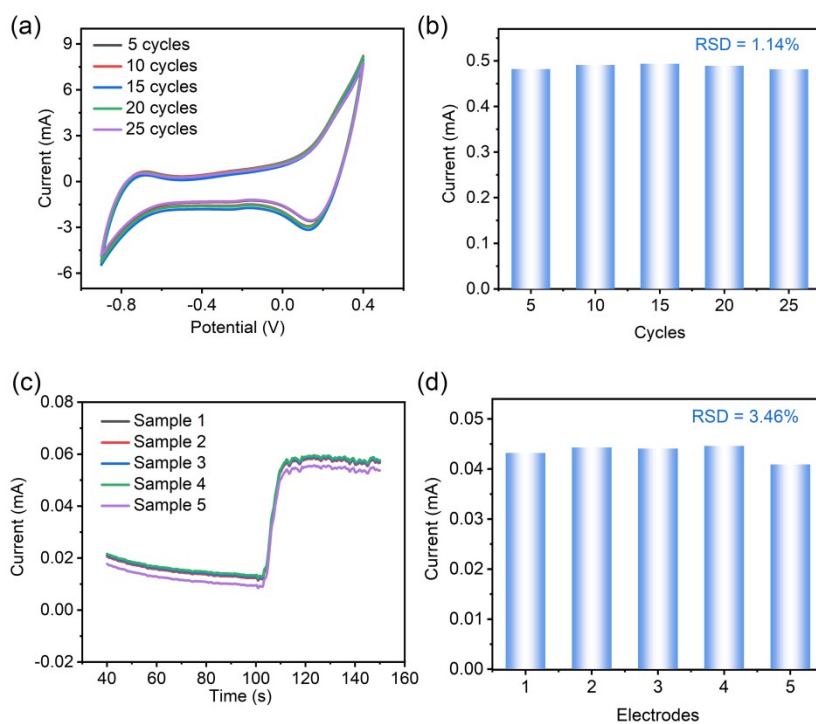

Fig. S3 (a) Recycled CV curves of NiCoFe LDH/FF electrode in 3 mM glucose at a scan rate of 50 mV/s and (b) corresponding repeatability measurements of the electrode;(c) Current response of five independent electrodes, and (d) reproducibility measurement of the five electrodes (Electrolyte: 0.10 M NaOH).

### Reference

[1] J. Li, L. Wang, Y. Yang, B. Wang, C. Duan, L. Zheng, R. Li, Y. Wei, J. Xu, Z. Yin, *Nanotechnology*, 2021, 32, 505710.
